# Supplementary material
Source: MDPI journal article supplement (https://www.mdpi.com/2079-6412/12/8/1150)
Supplement: s1 [file s1]

# Supplementary Materials: Effect of Fluorinated Comonomer, Polymerizable Emulsifier, and Crosslinking on Water Resistance of Latex Coatings

Jana Machotova <sup>1,\*</sup>, Petr Knotek <sup>2</sup>, Eva Cernoskova <sup>3</sup>, Roman Svoboda <sup>4</sup>, Lucie Zarybnicka <sup>5,6</sup>, Miroslav Kohl <sup>1</sup> and Andrea Kalendova <sup>1</sup>

- <sup>1</sup> Institute of Chemistry and Technology of Macromolecular Materials, Faculty of Chemical Technology, University of Pardubice, Studentská 573, 532 10 Pardubice, Czech Republic; miroslav.kohl@upce.cz (M.K.); andrea.kalendova@upce.cz (A.K.)
- <sup>2</sup> Department of General and Inorganic Chemistry, Faculty of Chemical Technology, University of Pardubice, Studentská 573, 532 10 Pardubice, Czech Republic; petr.knotek@upce.cz
- <sup>3</sup> Joint Laboratory of Solid State Chemistry, Faculty of Chemical Technology, University of Pardubice, Studentská 84, 532 10 Pardubice, Czech Republic; eva.cernoskova@upce.cz
- <sup>4</sup> Department of Physical Chemistry, Faculty of Chemical Technology, University of Pardubice, Studentská 84, 532 10 Pardubice, Czech Republic; roman.svoboda@upce.cz
- <sup>5</sup> Department of Technical Studies, College of Polytechnics Jihlava, Tolstého 16, 586 01 Jihlava, Czech Republic; lucie.zarybnicka@vspj.cz
- <sup>6</sup> Institute of Theoretical and Applied Mechanics of the Czech Academy of Sciences, Centre Telč, Prosecká 809/76, 190 00 Praha, Czech Republic
- \* Correspondence: jana.machotova@upce.cz; Tel.: +420-466-037-194

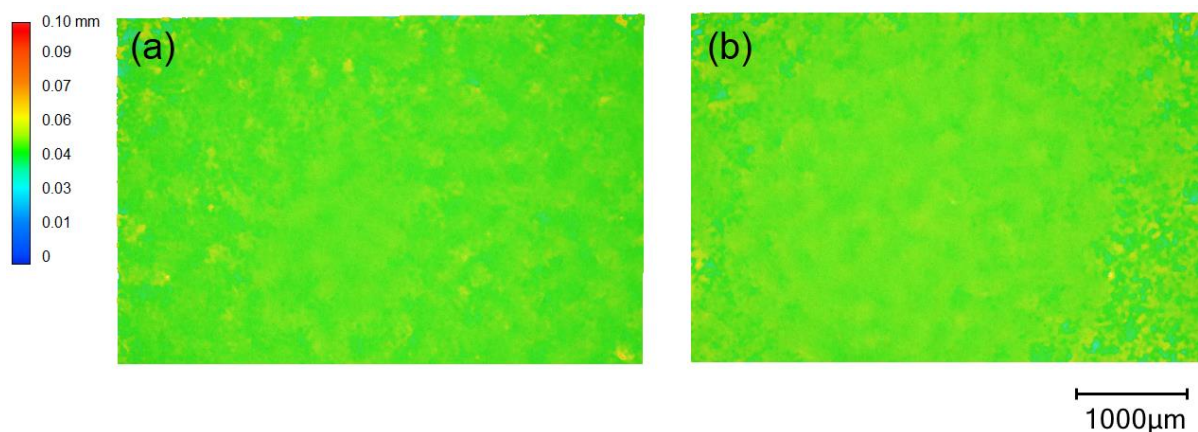

**Figure S1.** Macro surface appearance of latex coating films: (a) Sample D<sub>0</sub>; (b) Sample H<sub>0</sub>.
